# Supplementary material for: Forecasting COVID‐19 Cases Using Alpha‐Sutte Indicator: A Comparison with Autoregressive Integrated Moving Average (ARIMA) Method
Source: Hindawi journal article supplement (doi:10.1155/2020/8850199), 2020-01-01

Table 1: Summary Measures of Candidate ARIMA Models – Brazil Series

| Model        | BIC      | AIC      | AICc     |
|--------------|----------|----------|----------|
| ARIMA(2,2,2) | 3927     | 3911     | 3911     |
| ARIMA(0,2,0) | 4022     | 4019     | 4019     |
| ARIMA(1,2,0) | 4028     | 4021     | 4021     |
| ARIMA(0,2,1) | 4026     | 4019     | 4019     |
| ARIMA(1,2,2) | 3975     | 3962     | 3962     |
| ARIMA(2,2,1) | 3964     | 3951     | 3951     |
| ARIMA(3,2,2) | 3926     | 3906     | 3907     |
| ARIMA(3,2,1) | 3964     | 3947     | 3948     |
| ARIMA(4,2,2) | Infinity | Infinity | Infinity |
| ARIMA(3,2,3) | Infinity | Infinity | Infinity |
| ARIMA(2,2,3) | 3971     | 3952     | 3952     |
| ARIMA(4,2,1) | 3939     | 3919     | 3920     |
| ARIMA(4,2,3) | Infinity | Infinity | Infinity |

Table 2: Summary Measures of Candidate ARIMA Models – Italy Series

| Model        | BIC    | AIC    | AICc   |
|--------------|--------|--------|--------|
| ARIMA(2,2,2) | 3056   | 3039   | 3039   |
| ARIMA(0,2,0) | 3081   | 3078   | 3078   |
| ARIMA(1,2,0) | 3087   | 3080   | 3080   |
| ARIMA(0,2,1) | 3086   | 3079   | 3079   |
| ARIMA(1,2,2) | 3095.3 | 3081.8 | 3082   |
| ARIMA(2,2,1) | 3095.7 | 3082.3 | 3082.5 |
| ARIMA(3,2,2) | 3064   | 3043   | 3043.8 |
| ARIMA(2,2,3) | 3061   | 3040   | 3041.1 |

|              |        |      |        |
|--------------|--------|------|--------|
| ARIMA(1,1,2) | 3091   | 3081 | 3081   |
| ARIMA(1,2,3) | 3099.9 | 3083 | 3083   |
| ARIMA(3,2,1) | 3099.4 | 3082 | 3082   |
| ARIMA(3,2,3) | 3067   | 3043 | 3043.8 |

Table 3: Summary Measures of Candidate ARIMA Models – India Series

| Model        | BIC      | AIC      | AICc     |
|--------------|----------|----------|----------|
| ARIMA(2,2,2) | Infinity | Infinity | Infinity |
| ARIMA(0,2,0) | 4027     | 4023     | 4023     |
| ARIMA(1,2,0) | 4026     | 4019     | 4019     |
| ARIMA(0,2,1) | 4020     | 4014     | 4013     |
| ARIMA(1,2,1) | 4021     | 4010.9   | 4011     |
| ARIMA(0,2,2) | 4018     | 4008     | 4008     |
| ARIMA(1,2,2) | 4025     | 4011     | 4011.3   |
| ARIMA(0,2,3) | 4024     | 4010.1   | 4010     |
| ARIMA(1,2,3) | 4028     | 4010.9   | 4011.1   |

Table 4: Summary Measures of Candidate ARIMA Models – NZ Series

| Model        | BIC    | AIC    | AICc   |
|--------------|--------|--------|--------|
| ARIMA(2,2,2) | 1295.6 | 1279   | 1279.8 |
| ARIMA(0,2,0) | 1330   | 1327   | 1327   |
| ARIMA(1,2,0) | 1288   | 1282   | 1282   |
| ARIMA(0,2,1) | 1300   | 1294   | 1294   |
| ARIMA(0,2,2) | 1292   | 1274   | 1274   |
| ARIMA(1,2,1) | 1293   | 1283.5 | 1284   |

|              |        |        |      |
|--------------|--------|--------|------|
| ARIMA(0,2,3) | 1292.8 | 1275.9 | 1276 |
| ARIMA(1,2,2) | 1293   | 1277   | 1277 |

Table 5: Summary Measures of Candidate ARIMA Models – Pakistan Series

| Model        | BIC  | AIC    | AICc   |
|--------------|------|--------|--------|
| ARIMA(2,2,2) | 3489 | 3472.7 | 3473   |
| ARIMA(0,2,0) | 3608 | 3605   | 3605   |
| ARIMA(1,2,0) | 3578 | 3571   | 3571   |
| ARIMA(0,2,1) | 3507 | 3501   | 3501   |
| ARIMA(1,2,2) | 3508 | 3495   | 3496   |
| ARIMA(2,2,1) | 3488 | 3475   | 3475   |
| ARIMA(0,2,4) | 3496 | 3461.6 | 3461.8 |
| ARIMA(0,2,5) | 3483 | 3462.9 | 3463.3 |
| ARIMA(1,2,3) | 3488 | 3463.4 | 3463.7 |

Table 6: Summary Measures of Candidate ARIMA Models – Spain Series

| Model        | BIC      | AIC      | AICc     |
|--------------|----------|----------|----------|
| ARIMA(2,2,2) | 4537     | 4520     | 4520     |
| ARIMA(0,2,0) | 4720     | 4717     | 4717     |
| ARIMA(1,2,0) | 4677     | 4670     | 4670     |
| ARIMA(0,2,1) | 4569     | 4562     | 4562     |
| ARIMA(1,2,2) | 4542     | 4528     | 4528     |
| ARIMA(2,2,1) | 4551     | 4537     | 4538     |
| ARIMA(3,2,2) | 4562     | 4541     | 4541     |
| ARIMA(2,2,3) | Infinity | Infinity | Infinity |
| ARIMA(2,2,5) | 4505     | 4477     | 4477     |
| ARIMA(3,2,4) | 4506     | 4478     | 4478     |
| ARIMA(2,2,4) | 4499     | 4475     | 4475     |
| ARIMA(0,2,4) | 4535     | 4518     | 4518     |

|              |      |      |      |
|--------------|------|------|------|
| ARIMA(0,2,3) | 4530 | 4516 | 4516 |
|--------------|------|------|------|

Table 7: Summary Measures of Candidate ARIMA Models – South Africa Series

| Model        | BIC      | AIC      | AICc     |
|--------------|----------|----------|----------|
| ARIMA(2,2,2) | 3325     | 3309     | 3309     |
| ARIMA(0,2,0) | 3386     | 3383     | 3383.3   |
| ARIMA(1,2,0) | 3392     | 3385     | 3386     |
| ARIMA(0,2,1) | 3391     | 3384     | 3384.8   |
| ARIMA(1,2,2) | 3384     | 3371     | 3371.7   |
| ARIMA(2,2,1) | 3381     | 3368     | 3368     |
| ARIMA(3,2,2) | 3330     | 3310     | 3310     |
| ARIMA(3,2,1) | 3381     | 3364     | 3365     |
| ARIMA(3,2,3) | Infinity | Infinity | Infinity |
| ARIMA(1,2,3) | 3388     | 3372     | 3372.6   |
| ARIMA(1,2,1) | 3385     | 3375     | 3376     |
| ARIMA(3,2,2) | Infinity | Infinity | Infinity |

Figure 1: Residual Analysis of ARIMA (3,2,2) - Brazil

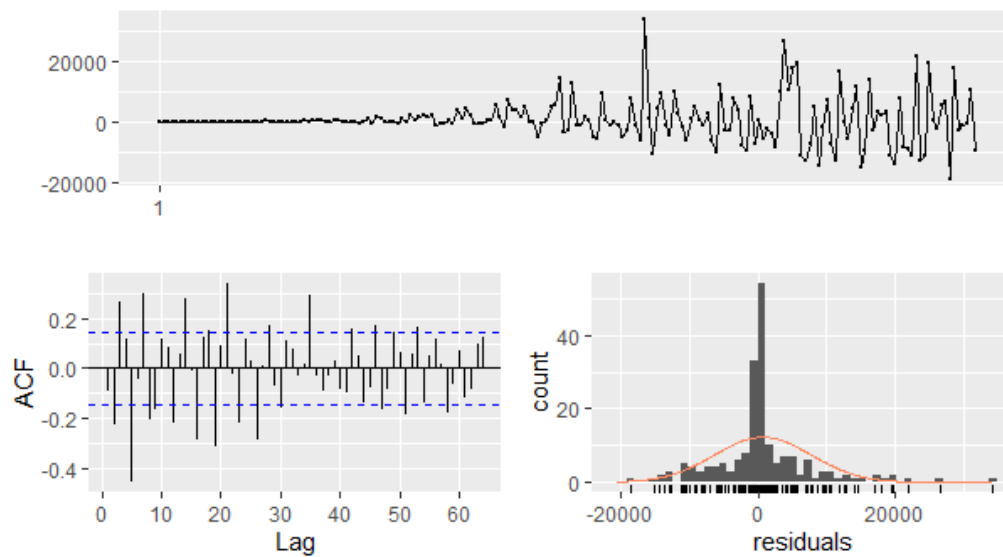

Figure 2: Residual Analysis of ARIMA (2,2,2) - Italy

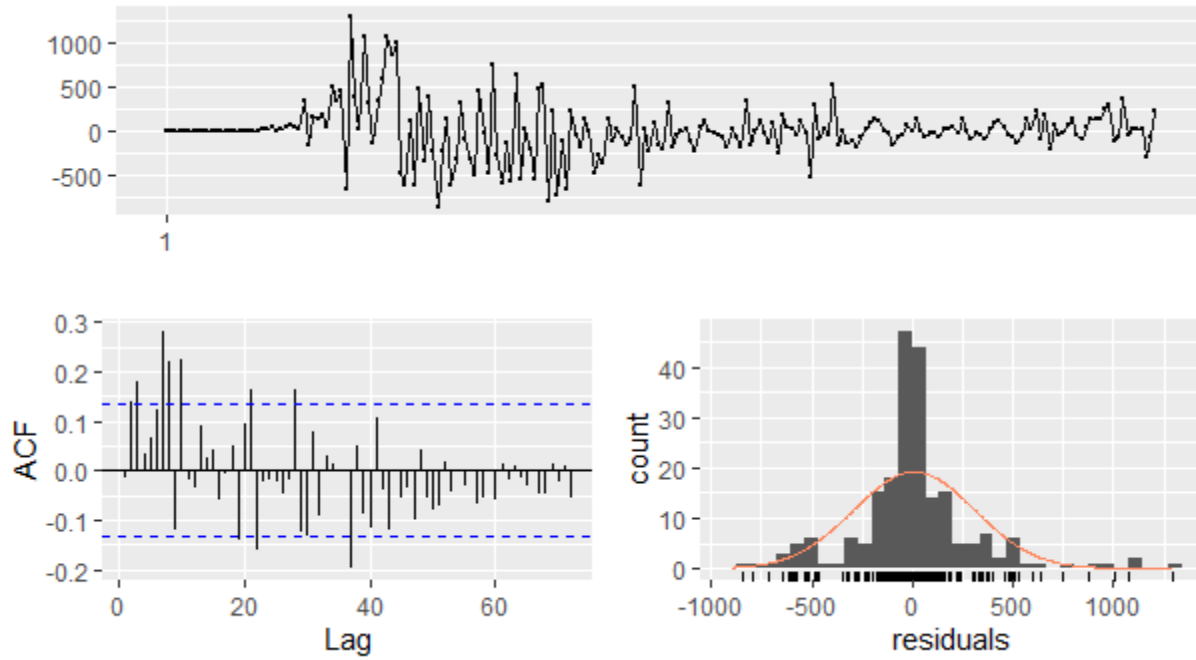

Figure 3: Residual Analysis of ARIMA (0,2,2) - India

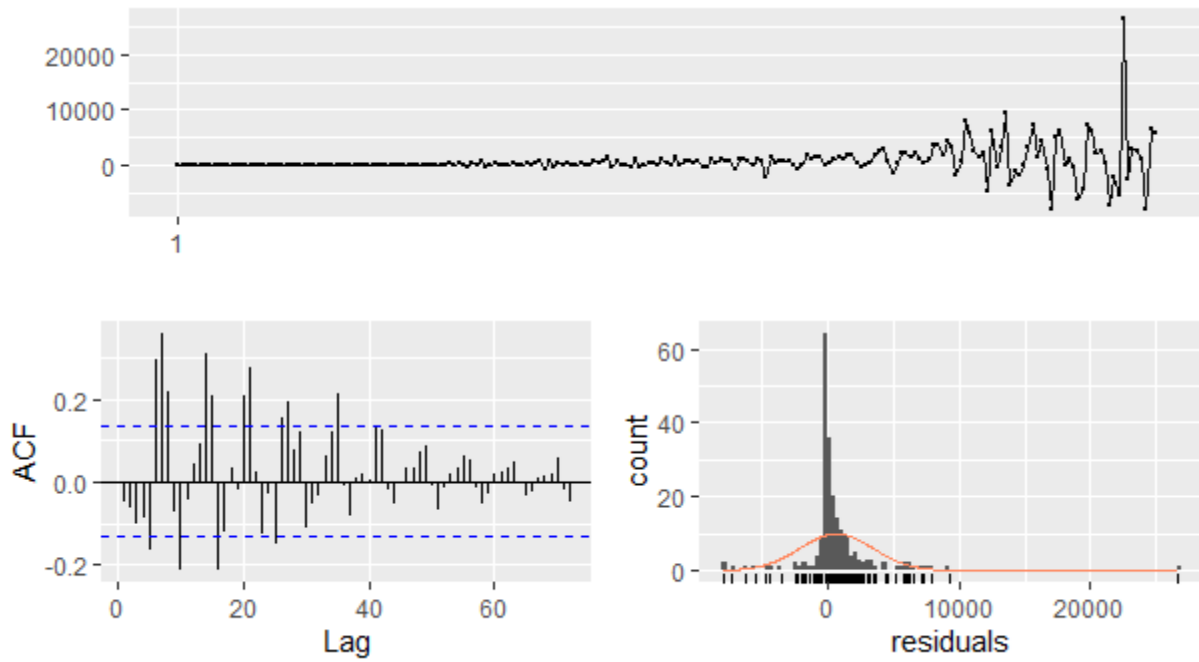

Figure 4: Residual Analysis of ARIMA (0,2,2) – New Zealand

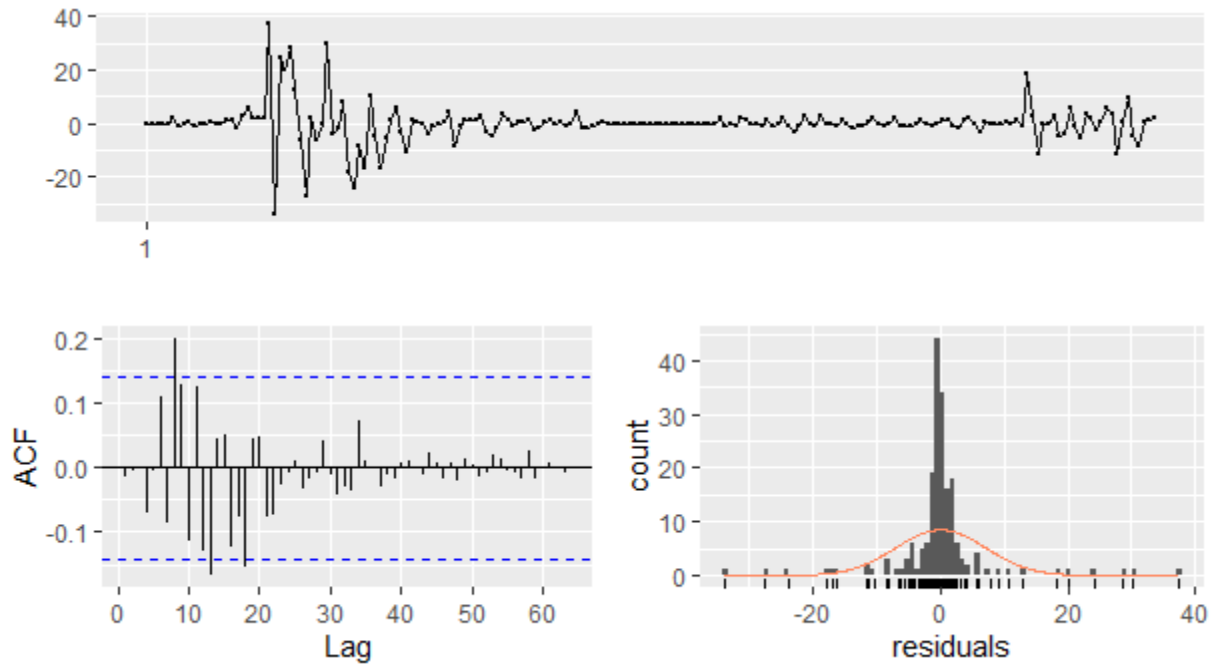

Figure 5: Residual Analysis of ARIMA (0,2,4) – Pakistan

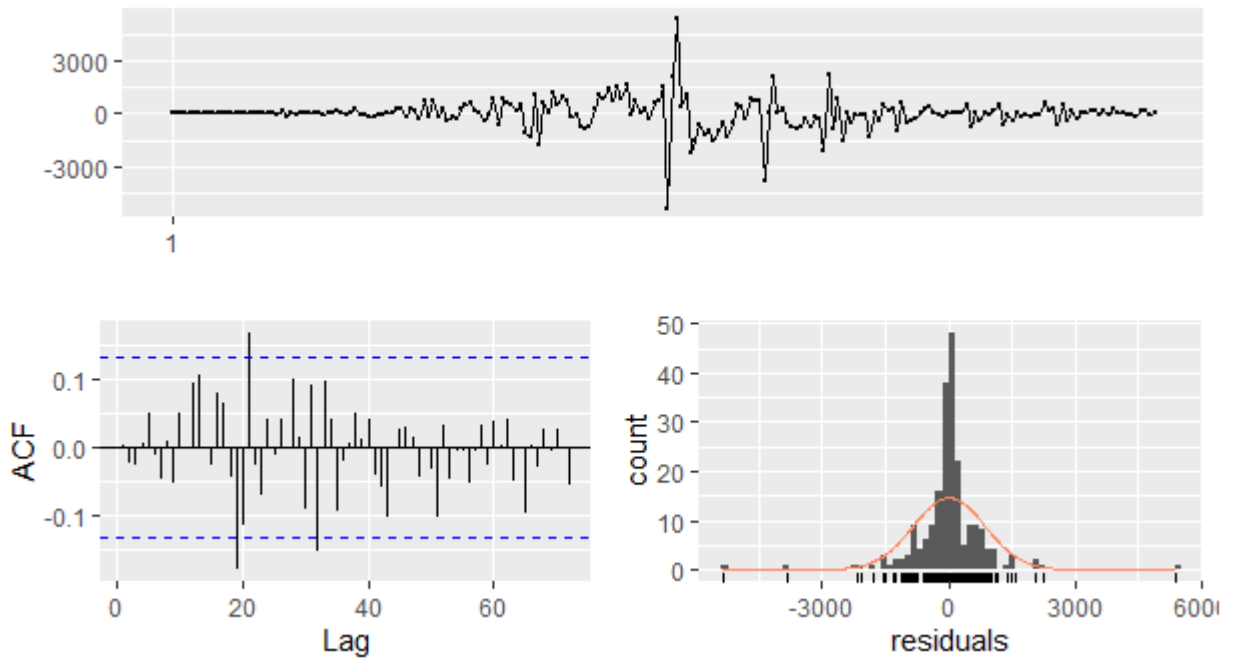

Figure 6: Residual Analysis of ARIMA (2,2,4) – Spain

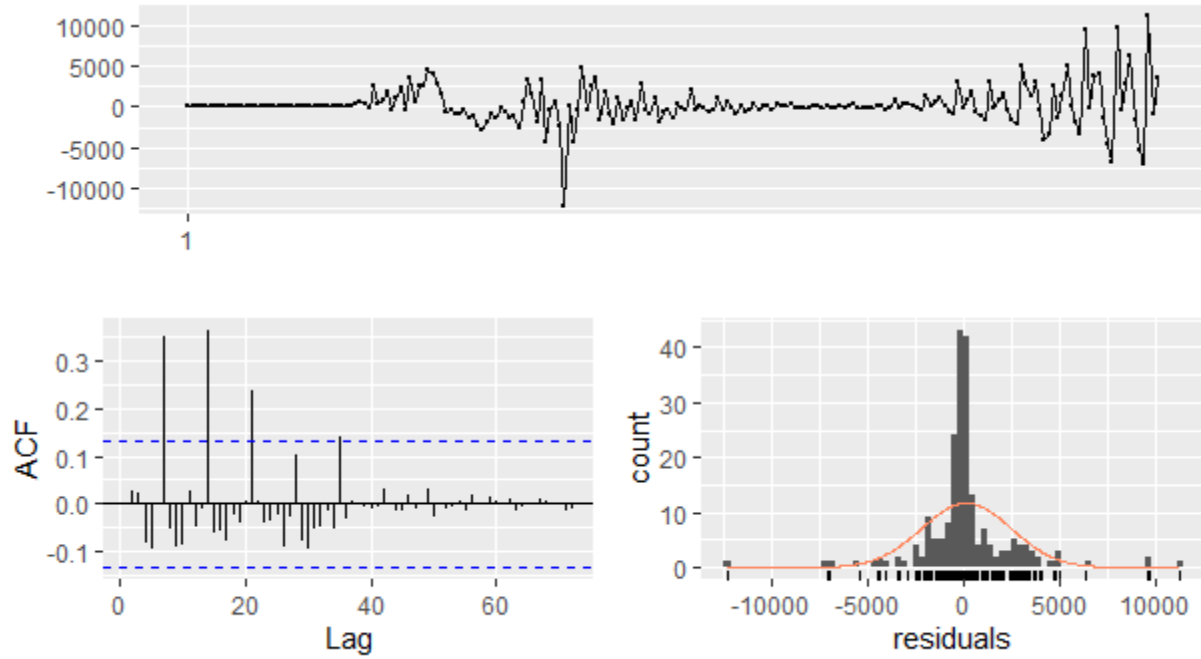

Figure 7: Residual Analysis of ARIMA (2,2,2) – South Africa

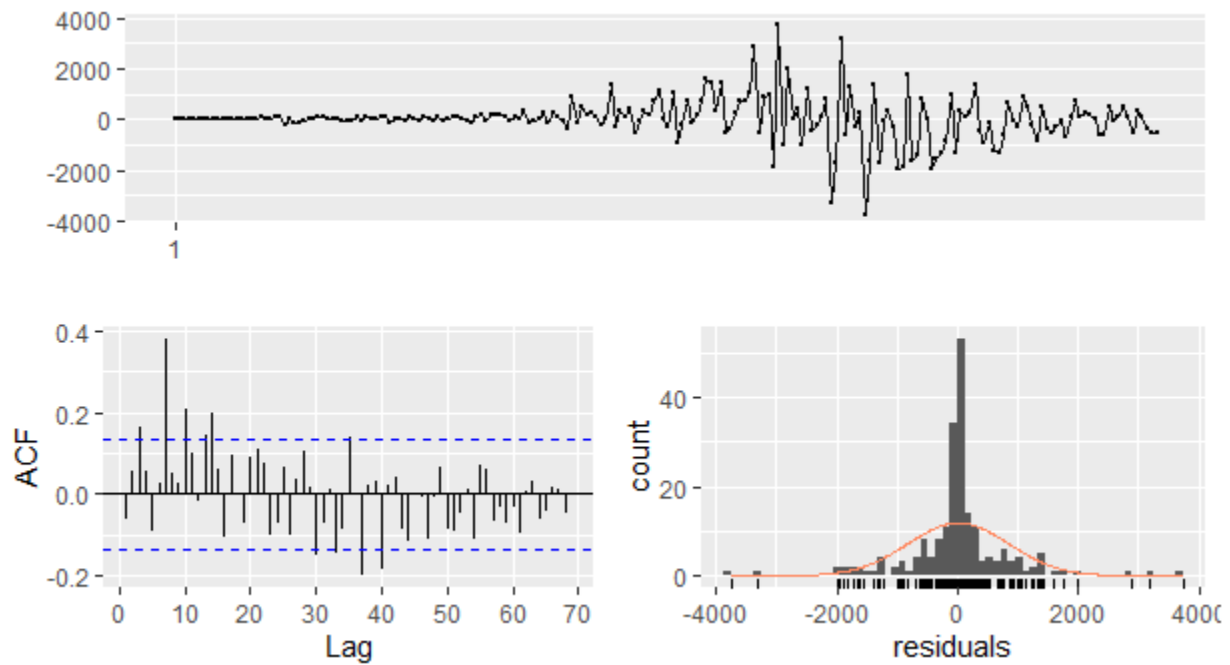

Supplement: f1 [file 8850199.f1.pdf]
